# Supplementary material
Source: publisher figshare collection journal article supplement (https://acs.figshare.com/ndownloader/files/4134964)
Supplement: Supplementary file 1 [file 4134964]

# **Size-dependent partitioning of nano/micro-particles mediated by membrane lateral heterogeneity**

**Tsutomu Hamada, Masamune Morita, Makiyo Miyakawa, Ryoko Sugimoto, Ai Hatanaka, Mun'delanj C. Vestergaard, Masahiro Takagi**

## **Contents:**

1. Partitioning of nano/micro-particles within Lo/Ld phase-separated membranes
2. Partitioning of nano/micro-particles within So/Ld phase-separated membranes
3. Adsorption of nano/micro-particles on homogeneous membranes
4. Comparison between bending and undulation energies
5. Energy comparison of laser-transportation and phase-partitioning

## 1. Partitioning of nano/micro-particles within Lo/Ld phase-separated membranes

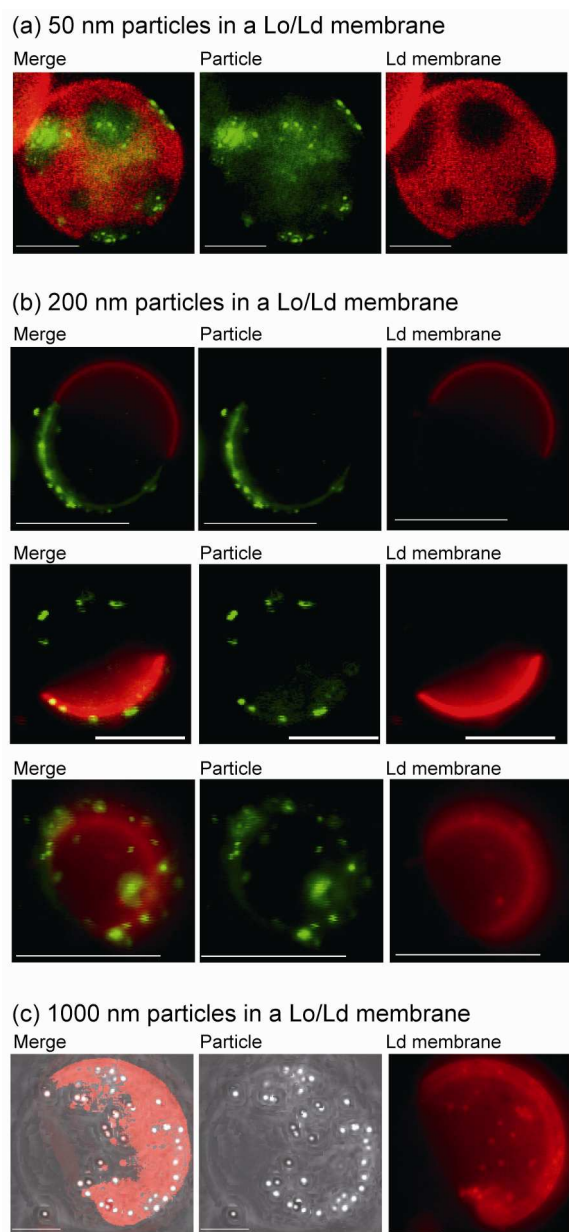

**Figure S1.** Selective partitioning of nano/micro-particles on Lo/Ld phase-separated membranes, where the membranes were stained by rho-PE (red), which partitions into the Ld phase. (a) 50 nm particles (green) distributed in the Lo phase. (b) 200 nm particles (green) localized in the Lo (upper), both Lo/Ld (middle) or Ld (lower) phase. (c) 1000 nm particles (without a fluorescent tag) partitioned into the Ld phase. Scale bars are 10  $\mu\text{m}$ .

## 2. Partitioning of nano/micro-particles within So/Ld phase-separated membranes

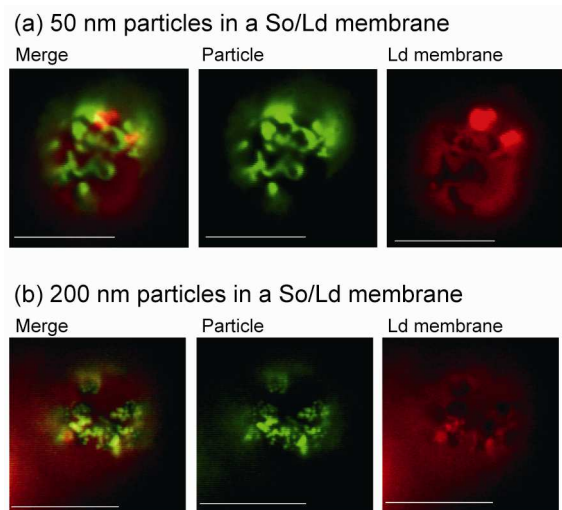

**Figure S2.** Selective partitioning of nano/micro-particles (green) on So/Ld phase-separated membranes, where the membranes were stained by rho-PE (red), which partitions into the Ld phase. 50 nm (a) and 200 nm (b) particles distributed in the So phase. Scale bars are 10  $\mu\text{m}$ .

### 3. Adsorption of nano/micro-particles on homogeneous membranes

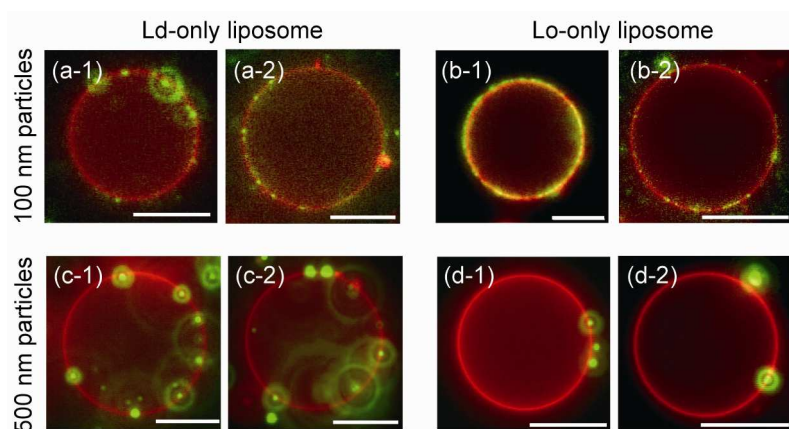

**Figure S3.** Adsorption of nano/micro-particles on Ld-only and Lo-only homogeneous membranes. (a) 100 nm particles on Ld-only DOPC liposomes. (b) 100 nm particles on Lo-only DPPC:Chol=50:50 liposomes. (c) 500 nm particles on Ld-only DOPC liposomes. (d) 500 nm particles on Lo-only DPPC:Chol=50:50 liposomes. Scale bars are 10  $\mu\text{m}$ .

#### 4. Comparison between bending and undulation energies

We estimate the energy contribution of thermal undulation and bending deformation for large particles of  $r > r^*$ . From equation (2), the partitioning energy per unit area due to undulation is given by

$$\frac{3(k_B T)^2}{2\pi^2} \left( \frac{1}{\kappa_{Ld}} - \frac{1}{\kappa_{Lo}} \right) \frac{1}{d^2}.$$

By substituting typical values of  $k_B T = 4 \times 10^{-21}$  J,  $\kappa_{Ld} = 10^{-19}$  J,  $\kappa_{Lo} = 1.25 \times 10^{-19}$  J and  $d = 10$  nm (we assumed that the length of the undulation space is 10 nm, which should be somewhat larger than the expected particle-membrane distance ( $\sim 3$  nm), because only a particle-adhered one surface restricts membrane undulation.),<sup>1</sup> we obtain  $\frac{12}{\pi^2} \times 10^{-5} \times k_B T \text{ nm}^{-2}$ . Assuming that one third of the surface area of a 500 nm particle is wrapped and this area contributes the restriction of membrane undulation, the total energy cost due to undulation is estimated to be  $3.2 k_B T$ . In contrast, typical energy contribution due to bending for the wrapping of one third of the particle is  $\frac{1}{3} \times 8\pi(\kappa_{Lo} - \kappa_{Ld}) \cong 52 k_B T$  (we assume that the spontaneous curvature of the membrane is zero), which is one order larger than energy contribution of undulation.

## 5. Energy comparison of laser-transportation and phase-partitioning

The order of the transportation energy can be estimated by considering the domain that is deformed due to particle movement as shown in Fig. 3e; the energy cost of domain deformation can be described as  $\sigma\Delta l \sim 10^{-18}$  J, where  $\sigma$  is the line tension ( $\sim 10^{-12}$  N) <sup>1</sup> and  $\Delta l$  is a change in the boundary length of a domain (from the microscopic images,  $\Delta l$  is essentially on the order of 1  $\mu\text{m}$ ). On the other hand, based on our present model, the partitioning energy of a 1000 nm particle, which is larger than  $r^*$ , is shown as the bending deformation energy with eq. (1). Although a detailed calculation for particle-induced membrane deformation is beyond the scope of this paper, the bending energy may be attributed to the curved region needed to wrap the particle ( $8\pi\kappa \sim 2 \cdot 10^{-18}$  J for complete wrapping) and to the region of the membrane-particle contact line <sup>2</sup>. Therefore, the expected total bending energy that governs particle-partitioning would be expected to be greater than the transportation energy ( $\sim 10^{-18}$  J).

### References:

- (1) Baumgart, T.; Hess, S.T.; Webb, W.W. *Nature* **2003**, 425, 821.
- (2) Dietrich, C.; Angelova, M.; Pouligny, B. *J Phys II* **1997**, 7, 1651.
